# Supplementary material for: Impact of Heavy Metals on Human Male Fertility—An Overview
Source: MDPI journal article supplement (doi:10.3390/antiox10091473), 2021-09-15
Supplement: s1 [file s1]

## Supplemental information

**Table S1.** Tittle, author and year of the 52 reviews analyzed in this study that reviewed the relationship between heavy metals and human male fertility.

| Reference                    | Tittle                                                                                                                               |
|------------------------------|--------------------------------------------------------------------------------------------------------------------------------------|
| Abarikwu 2013                | Causes and risk factors for male-factor infertility in Nigeria                                                                       |
| Ashiru and Odusanya 2009     | Fertility and occupational hazards: Review of the literature                                                                         |
| Balabanic and Klemencic 2014 | Diet containing endocrine-disruptors and reproductive health                                                                         |
| Bjørklund et al. 2019        | Mercury exposure and its effects on fertility and pregnancy outcome                                                                  |
| Bonde 2010                   | Male reproductive organs are at risk from environmental hazards                                                                      |
| Dai et al. 2015              | The hazardous effects of tobacco smoking on male fertility                                                                           |
| de Angelis et al. 2017       | The environment and male reproduction: The effect of cadmium exposure on reproductive function and its implication in fertility      |
| DeCelis et al. 1996          | Toxicology of male reproduction in animals and humans                                                                                |
| Droller 1996                 | Environment and the genitourinary tract                                                                                              |
| Fallah et al. 2018           | Zinc is an essential element for male fertility: A review of zn roles in men's health, germination, sperm quality, and fertilization |
| Figa-Talamanca et al. 2001   | Occupational exposures to metals, solvents and pesticides: Recent evidence on male reproductive effects and biological markers.      |
| Giudice 2006                 | Infertility and the environment: The medical context                                                                                 |
| Grigore and Indrei, 2001     | The role of heat shock proteins in reproduction                                                                                      |
| Hales and Robaire 2001       | Review - paternal exposure to drugs and environmental chemicals: Effects on progeny outcome                                          |
| Henriques et al. 2019        | Exposure to mercury and human reproductive health: A systematic review                                                               |
| Hruska et al. 2000           | Environmental factors in infertility                                                                                                 |
| Ilieva et al. 2020           | Toxic effects of heavy metals (lead and cadmium) on sperm quality and male fertility                                                 |
| Jenardhanana et al. 2016     | Effect of environmental contaminants on spermatogenesis.                                                                             |
| Jensen et al. 2006           | The influence of occupational exposure on male reproductive function                                                                 |
| Kaminski et al. 2020         | External and genetic conditions determining male infertility                                                                         |
| Kumar 2004                   | Occupational exposure associated with reproductive dysfunction                                                                       |
| Kumar 2018                   | Occupational and environmental exposure to lead and reproductive health impairment: An overview                                      |

|                                      |                                                                                                                   |
|--------------------------------------|-------------------------------------------------------------------------------------------------------------------|
| <b>Kumar and Sharma 2019</b>         | Cadmium toxicity: Effects on human reproduction and fertility                                                     |
| <b>Lavranos et al. 2012</b>          | Investigating ROS sources in male infertility: A common end for numerous pathways                                 |
| <b>Lovakovic 2020</b>                | Cadmium, arsenic, and lead: Elements affecting male reproductive health                                           |
| <b>Ma et al. 2016</b>                | Effects of environmental contaminants on fertility and reproductive health.                                       |
| <b>Manfo et al. 2014</b>             | Effect of environmental contaminants on mammalian testis.                                                         |
| <b>Martynowicz et al. 2005</b>       | Effects of cadmium on testis function.                                                                            |
| <b>Marzec-Wroblewska et al. 2012</b> | Influence of chemical elements on mammalian spermatozoa                                                           |
| <b>Najafi et al. 2015</b>            | Air pollution and quality of sperm: A meta-analysis.                                                              |
| <b>Neuer et al. 2000</b>             | The role of heat shock proteins in reproduction                                                                   |
| <b>Ogorek et al. 2017</b>            | Role of copper in the process of spermatogenesis                                                                  |
| <b>Pieczynska and Grajeta 2015</b>   | The role of selenium in human conception and pregnancy                                                            |
| <b>Plunk and Richards 2020</b>       | Endocrine-disrupting air pollutants and their effects on the hypothalamus-pituitary-gonadal axis                  |
| <b>Ramos-Trevino et al. 2018</b>     | Toxic effect of cadmium, lead, and arsenic on the Sertoli cell: Mechanisms of damage involved.                    |
| <b>Reis et al. 2015</b>              | Sertoli cell as a model in male reproductive toxicology: Advantages and disadvantages                             |
| <b>Rezk and Sikka 2011</b>           | Developmental and reproductive disorders: Role of endocrine disruptors in testicular toxicity                     |
| <b>Rier 2008</b>                     | Environmental immune disruption: A comorbidity factor for reproduction?                                           |
| <b>Rogers 2008</b>                   | Tobacco and pregnancy: Overview of exposures and effects                                                          |
| <b>Sengupta et al. 2017</b>          | Evidence for decreasing sperm count in African population from 1965 to 2015                                       |
| <b>Sheiner et al. 2003</b>           | Effect of occupational exposures on male fertility: Literature review                                             |
| <b>Sheweita et al. 2005</b>          | Mechanisms of male infertility: Role of antioxidants                                                              |
| <b>Siu et al. 2009</b>               | Cadmium-induced testicular injury                                                                                 |
| <b>Skolarczyk et al. 2018</b>        | The impact of cadmium on male infertility                                                                         |
| <b>Takeda et al. 2004</b>            | Endocrine-disrupting activity of chemicals in diesel exhaust and diesel exhaust particles                         |
| <b>Thompson and Bannigan, 2008</b>   | Cadmium: Toxic effects on the reproductive system and the embryo                                                  |
| <b>Vigeh et al. 2011</b>             | How does lead induce male infertility?                                                                            |
| <b>Wan et al. 2013</b>               | Targeting testis-specific proteins to inhibit spermatogenesis: Lesson from endocrine disrupting chemicals.        |
| <b>Webb et al. 2014</b>              | Developmental and reproductive effects of chemicals associated with unconventional oil and natural gas operations |

|                              |                                                                                     |
|------------------------------|-------------------------------------------------------------------------------------|
| <b>Wirth and Mijal, 2010</b> | Adverse effects of low-level heavy metal exposure on male reproductive function     |
| <b>Zenzes 2000</b>           | Smoking and reproduction: Gene damage to human gametes and embryos                  |
| <b>Zhang et al. 2019</b>     | Relationship between cadmium content in semen and male infertility: A meta-analysis |

**Table S2.** Tittle, author and year of 2 clinical trials analyzed in this study that studied the relationship between heavy metals and human male fertility.

| <b>Author</b>                | <b>Tittle</b>                                                                                                                                          |
|------------------------------|--------------------------------------------------------------------------------------------------------------------------------------------------------|
| <b>Alexander et al. 1998</b> | Interaction of blood lead and delta-aminolevulinic acid dehydratase genotype on markers of heme synthesis and sperm production in lead smelter workers |
| <b>Ali et al. 2017</b>       | Mapping fifteen trace elements in human seminal plasma and sperm DNA                                                                                   |

**Table S3.** Tittle, author and year of the 90 articles analyzed in this study that studied the relationship between heavy metals and human male fertility.

| <b>Author</b>                | <b>Tittle</b>                                                                                                                      |
|------------------------------|------------------------------------------------------------------------------------------------------------------------------------|
| <b>Apostoli et al. 1999</b>  | Critical aspects of male fertility in the assessment of exposure to lead                                                           |
| <b>Araya et al. 2003</b>     | Human spermatozoa motility analysis in a ringer's solution containing cupric ions                                                  |
| <b>Balabanic et al. 2011</b> | Negative impact of endocrine-disrupting compounds on human reproductive health                                                     |
| <b>Benoff et al. 2000</b>    | Metal ions and human sperm mannose receptors                                                                                       |
| <b>Bloom et al. 2015</b>     | Birth outcomes and background exposures to select elements, the longitudinal investigation of fertility and the environment (LIFE) |
| <b>Chen et al. 2015</b>      | Rare earths exposure and male infertility: The injury mechanism study of rare earths on male mice and human sperm.                 |
| <b>Comhaire et al. 2007</b>  | Sperm quality, birth rates and the environment in Flanders (Belgium)                                                               |
| <b>Dandevi et al. 2003</b>   | Semen quality of Indian welders occupationally exposed to nickel and chromium                                                      |

|                                   |                                                                                                                                                       |
|-----------------------------------|-------------------------------------------------------------------------------------------------------------------------------------------------------|
| <b>De Fleurian et al. 2009</b>    | Occupational exposures obtained by questionnaire in clinical practice and their association with semen quality                                        |
| <b>Dickman and Leung 1998</b>     | Mercury and organochlorine exposure from fish consumption in Hong Kong.                                                                               |
| <b>Dickman et al. 1998</b>        | Hong Kong male subfertility links to mercury in human hair and fish.                                                                                  |
| <b>Elsamanoudy et al. 2014</b>    | Possible effects of metallosis on spermatozoal apoptotic genes expression in individuals with intramedullary nailing prosthesis                       |
| <b>Evans 2011</b>                 | Endocrine disruptors                                                                                                                                  |
| <b>Fatima et al. 2015</b>         | Association of blood and semen lead and zinc level with semen parameter in the male partner of infertile couple                                       |
| <b>Garcia-Herrero et al. 2011</b> | Differential transcriptomic profile in spermatozoa achieving pregnancy or not via ICSI                                                                |
| <b>Gerhard et al. 1998</b>        | Heavy metals and fertility                                                                                                                            |
| <b>Ghaffari and Motlagh 2011</b>  | In vitro effect of lead, silver, tin, mercury, indium and bismuth on human sperm creatine kinase activity: A presumable mechanism for men infertility |
| <b>Ghiasvand et al. 2020</b>      | The association between animal flesh foods consumption and semen parameters among infertile Iranian men: A cross-sectional study                      |
| <b>Hanf et al. 1996</b>           | Mercury in urine and ejaculate in husbands of barren couples                                                                                          |
| <b>Hardneck et al. 2018</b>       | Quantitative assessment of heavy metal effects on sperm function using computer-aided sperm analysis and cytotoxicity assays.                         |
| <b>Hassan et al. 2019</b>         | The protective effect of epigallocatechin-3-gallate on testicular oxidative stress in lead-induced toxicity mediated by Cyp19 gene / estradiol level  |
| <b>He et al. 2016</b>             | Lead inhibits human sperm functions by reducing the levels of intracellular calcium, cAMP, and tyrosine phosphorylation                               |
| <b>He et al. 2020</b>             | Heavy metal exposure, oxidative stress and semen quality: Exploring associations and mediation effects in reproductive-aged men                       |
| <b>Huang et al. 2001</b>          | In vitro effects of metal ions (Fe <sup>2+</sup> , Mn <sup>2+</sup> , Pb <sup>2+</sup> ) on sperm motility and lipid peroxidation in human semen      |
| <b>Hunter 2011</b>                | The cost of living longer fertility trades with immunity and life expectancy                                                                          |
| <b>Inhorn et al. 2008</b>         | Occupational and environmental exposures to heavy metals: Risk factors for male infertility in Lebanon?                                               |
| <b>Irgens et al. 1999</b>         | The effect of male occupational exposure in infertile couples in Norway.                                                                              |
| <b>Jeng et al. 2015</b>           | Role of low exposure to metals as male reproductive toxicants.                                                                                        |
| <b>Kahraman et al. 2012</b>       | The effect of blood and seminal plasma heavy metal and trace element levels on sperm quality                                                          |
| <b>Keck et al. 1995</b>           | Lack of correlation between cadmium in seminal plasma and fertility status of nonexposed individuals and 2 cadmium-exposed patients                   |
| <b>Kim et al. 2014</b>            | Toxic metals in seminal plasma and in vitro fertilization (IVF) outcomes                                                                              |
| <b>Kislitskaya et al. 2015</b>    | Disturbance of antioxidant enzymes and purine metabolism in the ejaculate of men living in disadvantaged areas of Kyzylorda region.                   |
| <b>Kumar et al. 2000</b>          | Chlorinated pesticides and heavy metals in human semen                                                                                                |

|                                    |                                                                                                                                                                        |
|------------------------------------|------------------------------------------------------------------------------------------------------------------------------------------------------------------------|
| <b>Kumar et al. 2018</b>           | Role of environmental factors & oxidative stress with respect to in vitro fertilization outcome                                                                        |
| <b>Kuo et al. 1997</b>             | Semen quality in workers with long-term lead exposure: A preliminary study in Taiwan                                                                                   |
| <b>Leite et al. 2015</b>           | Environmentally realistic doses of cadmium as a possible etiologic agent for idiopathic pathologies                                                                    |
| <b>Lettieri et al. 2020</b>        | Discovery of the involvement in DNA oxidative damage of human sperm nuclear basic proteins of healthy young men living in polluted areas                               |
| <b>Lettieriet al. 2020</b>         | Molecular alterations in spermatozoa of a family case living in the land of fires-A first look at possible transgenerational effects of pollutants                     |
| <b>Li et al. 2008</b>              | Are serum zinc and copper levels related to semen quality?                                                                                                             |
| <b>Li et al. 2015</b>              | Biomonitoring of blood heavy metals and reproductive hormone level related to low semen quality                                                                        |
| <b>Li et al. 2014</b>              | Cadmium, chromium, and copper concentration plus semen-quality in environmental pollution site, china                                                                  |
| <b>Li et al. 2012</b>              | Effects of manganese on routine semen quality parameters: Results from a population-based study in china                                                               |
| <b>Li et al. 2016</b>              | Association between environmental exposure to cadmium and human semen quality.                                                                                         |
| <b>Lin et al. 1996</b>             | Fertility rates among lead workers and professional bus drivers: A comparative study                                                                                   |
| <b>Louis et al. 2012</b>           | Heavy metals and couple fecundity, the LIFE study                                                                                                                      |
| <b>Marchiani et al. 2019</b>       | Acute effects on human sperm exposed in vitro to cadmium chloride and diisobutyl phthalate.                                                                            |
| <b>Mendiola et al. 2011</b>        | Relationships between heavy metal concentrations in three different body fluids and male reproductive parameters: A pilot study                                        |
| <b>Mínguez-Alarcon et al. 2018</b> | Hair mercury (hg) levels, fish consumption and semen parameters among men attending a fertility center.                                                                |
| <b>Mitra et al. 2020</b>           | Lead and cadmium exposure induces male reproductive dysfunction by modulating the expression profiles of apoptotic and survival signal proteins in tea -garden workers |
| <b>Monsees et al. 2000</b>         | Sertoli cells as a target for reproductive hazards                                                                                                                     |
| <b>Moran-Martinez et al. 2013</b>  | Chronic environmental exposure to lead affects semen quality in a Mexican men population                                                                               |
| <b>Mukhopadhyay et al. 2010</b>    | CASA-based sperm kinematics of environmental risk factor-exposed human semen samples designated as normozoospermic in conventional analysis                            |
| <b>Murado et al. 2014</b>          | Oversimplification and overstandardization in biological methods: Sperm bioassays in ecotoxicology as a case of study and a proposal for their reformulation.          |
| <b>Naha and Chowdhury 2006</b>     | Inorganic lead exposure in battery and paint factory: Effect on human sperm structure and functional activity                                                          |
| <b>Naha et al. 2005</b>            | Structural alteration of spermatozoa in the persons employed in lead acid battery factor                                                                               |
| <b>Nath et al. 2010</b>            | Heavy metal contaminants and male reproductive health                                                                                                                  |

|                                    |                                                                                                                                                                  |
|------------------------------------|------------------------------------------------------------------------------------------------------------------------------------------------------------------|
| <b>Nivsarkar et al. 1998</b>       | A regulatory role of sulfhydryl groups in modulation of sperm membrane conformation by heavy metals: Sulfhydryl groups as markers for infertility assessment     |
| <b>Nykolaichuk et al. 2020</b>     | Impact of environmental factors on male reproductive health                                                                                                      |
| <b>Pant et al.2013</b>             | Semen quality of environmentally exposed human population: The toxicological consequence.                                                                        |
| <b>Pant et al. 2003</b>            | Lead and cadmium concentration in the seminal plasma of men in the general population: Correlation with sperm quality.                                           |
| <b>Pavlova and Atanassova 2018</b> | Impact of cadmium on male fertility                                                                                                                              |
| <b>Petrelli et al. 2001</b>        | Occupational exposure and male fertility. results of an Italian multicenter study in an exposed population].                                                     |
| <b>Quansah and Jaakkola 2009</b>   | Paternal and maternal exposure to welding fumes and metal dusts or fumes and adverse pregnancy outcomes                                                          |
| <b>Rao et al. 2015</b>             | Evaluation of semen quality in 1808 university students, from Wuhan, central china                                                                               |
| <b>Riaz et al. 2016</b>            | Impact of reactive oxygen species on antioxidant capacity of male reproductive system.                                                                           |
| <b>Robert et al. 1997</b>          | Characterization of prostate-specific antigen proteolytic activity on its major physiological substrate, the sperm motility inhibitor precursor semenogelin I    |
| <b>Sengupta et al. 2013</b>        | Human sperm and other seminal constituents in male infertile patients from arsenic and cadmium rich areas of southern assam.                                     |
| <b>Shi et al. 2020</b>             | Interaction effect of polycyclic aromatic hydrocarbon metabolites and cadmium on semen quality in nonsmokers                                                     |
| <b>Skandhan et al. 2017</b>        | Level of copper in human split ejaculate                                                                                                                         |
| <b>Slivkova et al. 2009</b>        | Concentration of trace elements in human semen and relation to spermatozoa quality.                                                                              |
| <b>Snijder et al. 2011</b>         | Occupational exposure to endocrine disruptors and time to pregnancy among couples in a large birth cohort study: The generation R study                          |
| <b>Sobolev et al. 2018</b>         | Biological role of selenium in the organism of animals and humans                                                                                                |
| <b>Stassen et al. 2012</b>         | Metal exposure and reproductive disorders in indigenous communities living along the Pilcomayo river, Bolivia                                                    |
| <b>Stoltenberg et al. 1997</b>     | Histochemical demonstration of zinc ions in human epididymis using autometallography.                                                                            |
| <b>Stoltenberg et al. 1997</b>     | Histochemical demonstration of zinc ions in ejaculated human semen                                                                                               |
| <b>Sukhn et al. 2018</b>           | Associations of semen quality with non-essential heavy metals in blood and seminal fluid: Data from the environment and male infertility (EMI) study in Lebanon. |
| <b>Sun et al. 2017</b>             | Heavy metal level in human semen with different fertility: A meta-analysis.                                                                                      |
| <b>Telisman et al. 2007</b>        | Reproductive toxicity of low-level lead exposure in men.                                                                                                         |
| <b>Telisman et al. 2000</b>        | Semen quality and reproductive endocrine function in relation to biomarkers of lead, cadmium, zinc, and copper in men                                            |

|                               |                                                                                                                                                                                |
|-------------------------------|--------------------------------------------------------------------------------------------------------------------------------------------------------------------------------|
| <b>Wang et al. 2017</b>       | Associations between urinary polycyclic aromatic hydrocarbon metabolites and serum testosterone in US adult males: National health and nutrition examination survey 2011-2012. |
| <b>Wang et al. 2016</b>       | Variability of metal levels in spot, first morning, and 24-hour urine samples over a 3-month period in healthy adult Chinese men                                               |
| <b>Wang et al. 2017</b>       | Relationships between seminal plasma metals/metalloids and semen quality, sperm apoptosis and DNA integrity                                                                    |
| <b>Wijesekara et al. 2015</b> | Environmental and occupational exposures as a cause of male infertility                                                                                                        |
| <b>Wu et al. 2012</b>         | Lead level in seminal plasma may affect semen quality for men without occupational exposure to lead                                                                            |
| <b>Wu et al. 2020</b>         | Associations of toxic and essential trace elements in serum, follicular fluid, and seminal plasma with in vitro fertilization outcomes                                         |
| <b>Wulff et al. 1997</b>      | Infertility in an industrial setting - A population-based study from northern Sweden.                                                                                          |
| <b>Yoshida et al. 2008</b>    | Physiological roles of semenogelin I and zinc in sperm motility and semen coagulation on ejaculation in humans                                                                 |
| <b>Zafar et al. 2015</b>      | Toxic metals signature in the human seminal plasma of Pakistani population and their potential role in male infertility                                                        |
| <b>Zeng et al. 2015</b>       | Urinary metal concentrations in relation to semen quality: A cross-sectional study in china                                                                                    |
| <b>Zhou et al. 2016</b>       | Evaluation of urinary metal concentrations and sperm DNA damage in infertile men from an infertility clinic                                                                    |
